# Supplementary material for: Immunoproteasomes control activation of innate immune signaling and microglial function
Source: PubMed Central journal article supplement (PMC9584546; doi:10.3389/fimmu.2022.982786), 2022-10-06

# Immunoproteasomes control activation of innate immune signaling and microglial function

## *Supplementary Material*

**Gonca Çetin<sup>1</sup>, Maja Studencka-Turski<sup>1</sup>, Simone Venz<sup>1</sup>, Eileen Schormann<sup>2</sup>, Heike Junker<sup>1</sup>, Elke Hammer<sup>3</sup>, Uwe Völker<sup>3</sup>, Frédéric Ebstein<sup>1</sup>, Elke Krüger<sup>1\*</sup>**

<sup>1</sup>Institute of Medical Biochemistry and Molecular Biology, University Medicine Greifswald, Greifswald, Germany

<sup>2</sup>Institute of Biochemistry, Charité – University Medicine Berlin, Berlin, Germany

<sup>3</sup>Interfaculty Institute of Genetics and Functional Genomics, University Medicine Greifswald, Greifswald, Germany

**\* Correspondence:**

Elke Krüger

elke.krueger@uni-greifswald.de

**Supplementary Table 1**

| <b>Primary Antibodies</b>                           | <b>Dilution</b> |
|-----------------------------------------------------|-----------------|
| $\beta$ 5i/LPM7 (Serum - for mouse)                 | 1:100000        |
| $\beta$ 5i/LPM7 (sc-365699, Santa Cruz - for human) | 1:10000         |
| $\beta$ 1i/LMP2 (ab3328, Abcam)                     | 1:2000          |
| $\beta$ 2i/MECL-1 (Serum)                           | 1:50000         |
| $\beta$ 1 (Serum)                                   | 1:200000        |
| $\beta$ 2 (MCP165, EnzoLife Sciences)               | 1:6000          |
| $\beta$ 5 (ab3330, Abcam)                           | 1:2000          |
| Ubiquitin-K48 (#8081, Cell Signaling)               | 1:1000          |
| IRF3 (#4302, Cell Signaling)                        | 1:1000          |
| ph-IRF3 (#4947, Cell Signaling)                     | 1:1000          |
| STAT1 (#9172, Cell Signaling)                       | 1:1000          |
| ph-STAT1 (MA5-15071, Thermo Scientific)             | 1:1000          |
| STAT3 (ab50761, Abcam)                              | 1:500           |
| ph-STAT3 (ab76315, Abcam)                           | 1:1000          |
| TBK1 (#3013, Cell Signaling)                        | 1:1000          |
| ph-TBK1 (#5483, Cell Signaling)                     | 1:1000          |
| IKB $\alpha$ (#4812, Cell Signaling)                | 1:1000          |
| ph-IKB $\alpha$ (#9246, Cell Signaling)             | 1:1000          |
| NF- $\kappa$ B p65 (#4764S, Cell Signaling)         | 1:1000          |
| eIF2 $\alpha$ (#7922, Cell Signaling)               | 1:1000          |
| ph-eIF2 $\alpha$ (#7921, Cell Signaling)            | 1:1000          |
| ATF4 (#11815, Cell Signaling)                       | 1:1000          |
| CHOP (2895S, Cell Signaling)                        | 1:1000          |
| PERK (#3192, Cell Signaling)                        | 1:1000          |
| ph-PERK (#3179, Cell Signaling)                     | 1:1000          |
| PKR (#12297, Cell Signaling)                        | 1:1000          |
| ph-PKR (ab226852, Abcam)                            | 1:4000          |
| GCN2 (#65981, Cell Signaling)                       | 1:1000          |
| ph-GCN2 (AF7605-SP, R&D Systems)                    | 1:1000          |
| IBA-1 (1919741, Wako)                               | 1:2000          |
| Tubulin (ab7291, Abcam)                             | 1:50000         |
| $\beta$ -actin (sc47778, Santa Cruz)                | 1:5000          |
| <b>Secondary Antibodies</b>                         | <b>Dilution</b> |
| Anti-rabbit (#7074, Cell Signaling)                 | 1:10000         |
| Anti-mouse (#7076, Cell Signaling)                  | 1:10000         |

**Supplementary Table 2**

| <b>Gene</b>  | <b>Primers for mouse genes (5' → 3')</b> |                         |
|--------------|------------------------------------------|-------------------------|
| <i>Hprt</i>  | for                                      | GATCAGTCAACGGGGGACAT    |
|              | rev                                      | ACTTGCGCTCATCTTAGGCT    |
| <i>Stat3</i> | for                                      | GACACCATTCATTGATGCAG    |
|              | rev                                      | AAACGTGAGCGACTCAAAC     |
| <i>Il-6</i>  | for                                      | ACCAAGAGATAAGCTGGAGT    |
|              | rev                                      | TAGGCATAACGCACTAGGTT    |
| <i>Il-24</i> | for                                      | TGAAGAACACTGTGCAAACCTCA |
|              | rev                                      | TGCGGAACAGCAAAAACCG     |
| <b>Gene</b>  | <b>Primers for human genes (5' → 3')</b> |                         |
| <i>IL-24</i> | for                                      | CTGATATCTGCAGGGACAGA    |
|              | rev                                      | AGAAGGCCTTTTCTAGCTGT    |

**Supplementary Table 3**

| <b>Gene</b>   | <b>TaqMan probes for human genes</b> |
|---------------|--------------------------------------|
| <i>HPRT1</i>  | Hs99999909_m1                        |
| <i>ATF4</i>   | Hs00909569_g1                        |
| <i>CHOP</i>   | Hs00358796_g1                        |
| <i>IFNβ1</i>  | Hs01077958_s1                        |
| <i>IFI44</i>  | Hs00951349_m1                        |
| <i>ISG15</i>  | Hs00192713_m1                        |
| <i>IFIT1</i>  | Hs00356631_g1                        |
| <i>IFI27</i>  | Hs01086373_g1                        |
| <i>RSAD2</i>  | Hs00369813_m1                        |
| <i>OASL</i>   | Hs00388714_m1                        |
| <i>IFI44L</i> | Hs00915292_m1                        |
| <i>MX1</i>    | Hs00895608_m1                        |
| <i>IL-6</i>   | Hs00985639_m1                        |
| <i>IL-1β</i>  | Hs00174097_m1                        |
| <i>TNFα</i>   | Hs00174128_m1                        |

**Supplementary Table 4**

Description of experiment settings for LC-MS/MS analysis and database search

***Data dependent analyses (DDA)***

|                                                       |                                                                                                                                |
|-------------------------------------------------------|--------------------------------------------------------------------------------------------------------------------------------|
| <b><i>reversed phase liquid chromatography</i></b>    | <b>nano-Acquity UPLC (Waters Corp)</b>                                                                                         |
| <i>trap column</i>                                    | nanoACQUITY UPLC Symmetry C18 Trap Column, 100Å, 5 µm, 180 µm x 20 mm, 2G, V/M, Waters                                         |
| <i>analytical column</i>                              | BEH C18 nanoACQUITY Column 10K psi, 130Å, 1.7 µm, 100 µm X 100 mm, Waters                                                      |
| <i>flow rate</i>                                      | 400 nl/min                                                                                                                     |
| <i>column oven temperature</i>                        | 40°C                                                                                                                           |
| <i>buffer system</i>                                  | binary buffer system consisting of 0.1% acetic acid in HPLC-grade water (buffer A) and 100% ACN in 0.1% acetic acid (buffer B) |
| <i>gradient</i>                                       | gradient of buffer B: 5min 1% to 5 %, 63min 5% to 25%, 25min 25 to 60%, 2min 60% to 99%, 2min 99%, 1min 99% to 1%, 5 min 1%    |
| <b><i>Mass spectrometer</i></b>                       | <b>LTQ Orbitrap Velos</b>                                                                                                      |
| <i>operation mode</i>                                 | data-dependent                                                                                                                 |
| <i>electrospray</i>                                   | Nanospray Ion Source                                                                                                           |
| <b><i>Full MS</i></b>                                 |                                                                                                                                |
| <i>MS scan resolution</i>                             | 30,000                                                                                                                         |
| <i>AGC target</i>                                     | 1e6                                                                                                                            |
| <i>maximum ion injection time</i>                     | 10 ms                                                                                                                          |
| <i>scan range</i>                                     | 325 to 1525 m/z                                                                                                                |
| <i>spectra data type</i>                              | profile                                                                                                                        |
| <b><i>dd-MS2</i></b>                                  |                                                                                                                                |
| <i>MS/MS AGC target</i>                               | 3e4                                                                                                                            |
| <i>minimum ACG target</i>                             | -                                                                                                                              |
| <i>intensity threshold</i>                            | 2e3                                                                                                                            |
| <i>maximum ion injection time for the MS/MS scans</i> | 100 ms                                                                                                                         |
| <i>number of MS/MS scans</i>                          | Top 20                                                                                                                         |
| <i>spectra data type</i>                              | centroid                                                                                                                       |
| <i>selection for MS/MS</i>                            | 1                                                                                                                              |
| <i>isolation window</i>                               | 2.0 Da                                                                                                                         |
| <i>fixed first mass</i>                               | -                                                                                                                              |
| <i>dissociation mode</i>                              | collisional induced dissociation (CID)                                                                                         |
| <i>normalized collision energy</i>                    | 35                                                                                                                             |
| <i>charge exclusion</i>                               | unassigned,1, >3                                                                                                               |
| <i>dynamic exclusion</i>                              | 60 sec                                                                                                                         |

| <b>Proteome Discoverer 2.4</b>                              |                                                                                                              |
|-------------------------------------------------------------|--------------------------------------------------------------------------------------------------------------|
| <i>Analysis Type:</i> DDA                                   |                                                                                                              |
| <i>Search engine used:</i>                                  | Sequest HT                                                                                                   |
| <i>Min Peptide Length:</i>                                  | 7                                                                                                            |
| <i>Max Peptide Length:</i>                                  | 144                                                                                                          |
| <i>Missed Cleavages:</i>                                    | 3                                                                                                            |
| <i>Digest Type:</i>                                         | Specific                                                                                                     |
| <i>Enzymes / Cleavage Rules:</i>                            | Trypsin/P                                                                                                    |
| <i>Max Variable Modifications:</i>                          | 5                                                                                                            |
| <i>Database Original File:</i>                              | mouse_uniprot_swissprot_2020_04.fasta                                                                        |
| <i>Fixed Modifications::</i>                                |                                                                                                              |
| <i>Variable Modifications: :</i>                            | Carbamidomethyl (C)<br>Oxidation (M)<br>GG (K)<br>LRGG (K)<br>Nethylmaleimide (C)<br>Acetyl (Protein N-term) |
| <i>Mass tolerance for precursor ions:</i>                   | 10 ppm                                                                                                       |
| <i>Mass tolerance for fragment ions:</i>                    | 0.6 Da                                                                                                       |
| <i>Threshold score peptides</i>                             | FDR 0.01                                                                                                     |
| <i>Threshold score proteins</i>                             | FDR 0.01                                                                                                     |
| <i>Threshold score for accepting protein identification</i> | Two peptides (unique + razor)                                                                                |
| <i>Software/method used to evaluate site assignment</i>     | No PTM reported                                                                                              |

**Supplementary Figure 1. Quantification analysis of proteasome catalytic subunits in primary microglia, gating strategy of flow cytometry analysis from Figure 1 and fluorescence microscopy analysis of organotypic brain slice cultures.** (A) Quantification analysis of Western blot data from Figure 1A-B. (B) Gating strategy for primary microglia. Cells were determined by forward scatter area and side scatter area. Singlets were selected and cells were gated by negative control. (C), (D) Fluorescence microscopy analysis of organotypic brain slice cultures stained with pan-reactive proteasome activity-based probe Me4BodiPyFL-Ahx3Leu3VS (ABP) (488nm) (B) and, quantification of the microscopy data. All data are given (n=3) by mean  $\pm$  SEM; \*: P<0.05, \*\*: P < 0.01, \*\*\*: P < 0.001.

**Supplementary Figure 2. Quantification analysis of proteasome catalytic subunits in C20 cells and gating strategy of flow cytometry analysis from Figure 1, and cytotoxicity of ONX-0914 on C20 cells.** (A), (B) Quantification analysis of immunoproteasome (A) and standard proteasome (B) catalytic subunits Western blot data from Figure 1E. (C) Gating strategy of flow cytometry analysis for C20 cells in Figure 1. (D) Cell viability analysis of C20 cells following ONX-0914 treatment with the dose of 200nM for indicated time. All data are given (n=3) by mean  $\pm$  SEM; \*: P<0.05.

**Supplementary Figure 3. Immunoproteasome impairment disturbs protein homeostasis and activates PERK arm of UPR.** (A) Western blot analysis of poly-ubiquitylated proteins in human microglia C20 cells treated with different doses of ONX-0914 for 24h (n=3). (B) Quantification analysis of Western blot data from A. (C) Western blot analysis of PERK pathway proteins in C20 cells treated with different doses of ONX-0914 for 24h (n=3). (D) Quantification analysis of Western blot data from C. (E) Western blot analysis of UPR proteins and PCR analysis of transcription factor Xbp1 cDNA in C20 cells treated with 200nM ONX-0914 or DMSO for indicated time. Mean  $\pm$  SEM; \*: P<0.05, \*\*\*: P < 0.001.

**Supplementary Figure 4. Quantification analysis of Western blot data from Figure 2.** (A) Analysis of UPR/ISR proteins in C20 cells treated with 200nM of ONX-0914 or DMSO control for indicated time. (B) Analysis of UPR/ISR proteins in primary microglia. All data are given (n=3) by mean  $\pm$  SEM; \*: P<0.05, \*\*\*: P < 0.001.

**Supplementary Figure 5. Enrichment of ubiquitylated proteins.** Ubiquitin-modified proteins were enriched and prepared for mass spectrometric analysis. (A) Scheme showing the enrichment process. Protein extracts incubated with Ubi-Qapture-Q matrix containing ubiquitin-binding domain (UBD), ubiquitin-modified proteins were captured by the matrix and eluted, unmodified proteins in flow through were collected as unbound fractions. (B) Western blot analysis of poly-ubiquitylated proteins in untreated, 8h 50nM BTZ treated, and 8h 1 $\mu$ g/mL LPS stimulated WT and  $\beta$ 5i/LMP7 KO primary microglia total protein extracts. (C), (D) Western blot analysis of ubiquitylated proteins in unbound fractions (B) and elution fractions (C) after enrichment assay. (E) Quantification analysis of Western blot data from B. Mean  $\pm$  SEM; \*\*\*: P < 0.001.

**Supplementary Figure 6. Identification of ubiquitylated proteins by proteomics.** (A) Scheme showing the identification process. Enriched ubiquitin-modified proteins were prepared for LC-MS/MS measurement using single pot solid-phase enhanced sample preparation (SP3) technology. Protein identification and quantification were performed using Proteome Discoverer 2.4. (B) Venn diagrams showing the total numbers of identified proteins in each experiment (n=3). (C), (D), (E) Venn diagrams showing the numbers of identified proteins in untreated (C), 8h 50nM BTZ treated (D) and 8h 1 $\mu$ g/mL LPS stimulated (E) WT and  $\beta$ 5i/LMP7 KO primary microglia (n=3; fold change cut off 1,3). (F) Table showing the most affected cellular mechanisms (top 5) in immunoproteasome (IP) deficiency as indicated by the change of ubiquitylated proteins in  $\beta$ 5i/LMP7 KO comparison to WT (n=3; fold change cut off 1,3). (G) Table showing affected cellular mechanisms (top 5), which proteins preferentially degraded by IP involved in (n=3; fold change cut off 1,3).

**Supplementary Figure 7. Translocation of phosphorylated STAT3 to nucleus from cytosol and increase of nuclear factor-kappa B (NF- $\kappa$ B) pathway proteins in primary murine microglia.** (A) Western blot analysis of ph-STAT3 translocation to nucleus in primary mouse microglia. (B) Quantification analysis of ph-STAT3 in nuclear fraction (normalized to Histone3). All data are given (n=3) by mean  $\pm$  SEM; \*: P < 0.05.

**Supplementary Figure 8. Analysis of type I IFN response proteins in C20 cells treated with different doses of ONX-0914 for 24h.** (A) Western blot analysis of type I IFN response proteins. (B) Quantification analysis of Western blot data from A.

**Supplementary Figure 9. Analysis of innate immune signaling activation in C20 cells upon IP inhibition.** (A) Quantification analysis of Western blot data from Figure 5A (n=3). (B) qRT-PCR

analysis of ISGs in ONX-0914 treated C20 cells for indicated time (n=5). (C) Quantification analysis of Western blot data from Figure 5D (n=3). Mean  $\pm$  SEM; \*: P<0.05, \*\*: P < 0.01, \*\*\*: P < 0.001.

**Supplementary Figure 10. ISR inhibitor treatments in C20 human microglia.** (A) C20 cells pre-treated with different doses of GSK2606414 or C16 for 2h and subjected to 200nM of ONX-0914 for 24h. (B) Cell viability analysis of C20 cells following 1 $\mu$ M C16 treatment for indicated time. (C) Quantification analysis of Western blot data from Figure 6A-B. All data are given (n=3) by mean  $\pm$  SEM; \*: P<0.05, \*\*: P < 0.01.

**Supplementary Figure 11. PKR controls activation of innate immune signaling in human microglia C20 cells upon IP inhibition.** (A) Quantification analysis of Western blot data from Figure 6E. (B) qRT-PCR analysis of ISGs in pre-treated with 1 $\mu$ M of C16 and subjected to 200nM of ONX-0914 C20 cells for 24h. (C) Quantification analysis of Western blot data from Figure 6H. All data are given (n=3) by mean  $\pm$  SEM; \*: P<0.05, \*\*: P < 0.01, \*\*\*: P < 0.001.

**Supplementary Figure 12. Flow cytometric analysis and gating strategies for CD11b staining.** (A) Gating strategy of flow cytometry analysis of total cells in the brain, singlets were selected and cells were gated by negative control. (B) Gating strategy of flow cytometry analysis of MACS isolated CD11b+ cells, singlets were selected and cells were gated by negative control. (C), (D) Flow cytometric analysis of MACS isolated CD11b+ WT and  $\beta$ 5i/LMP7 KO cells. Mean  $\pm$  SEM (n=3); \*\*: P<0.01.

**Supplementary Figure 13. Flow cytometric analysis and gating strategy for CD68 or CD45 and amyloid beta (A $\beta$ ) treated primary microglia.** Cells were detected by forward scatter area and side scatter area, singlets were selected and cells were gated by negative control. (A), (B) Flow cytometric analysis of CD68+ cells in wild type (WT) and  $\beta$ 5i/LMP7 knockout (KO) primary microglia. (C), (D) Flow cytometric analysis of CD45+ cells in wild type (WT) and  $\beta$ 5i/LMP7 knockout (KO) primary microglia. (E) Gating strategy of flow cytometry analysis of A $\beta$ + cells in CD45+ cells. Mean  $\pm$  SEM (n=3); \*: P<0.05.

**Supplementary Figure 14. Transcriptional analysis of IL-24 in microglia.** (A) qRT-PCR analysis of IL-24 in C20 cells and primary mouse microglia isolated from WT and  $\beta$ 5i/LMP7 KO mice. Data are given (n=3) by mean  $\pm$  SEM.

Supplementary Figure 1

Primary microglia

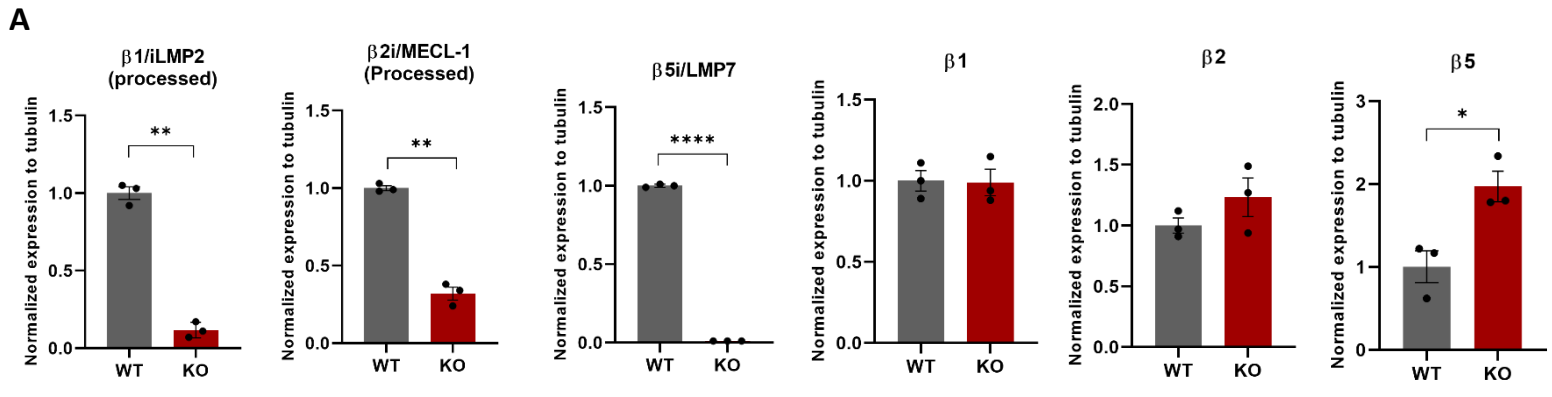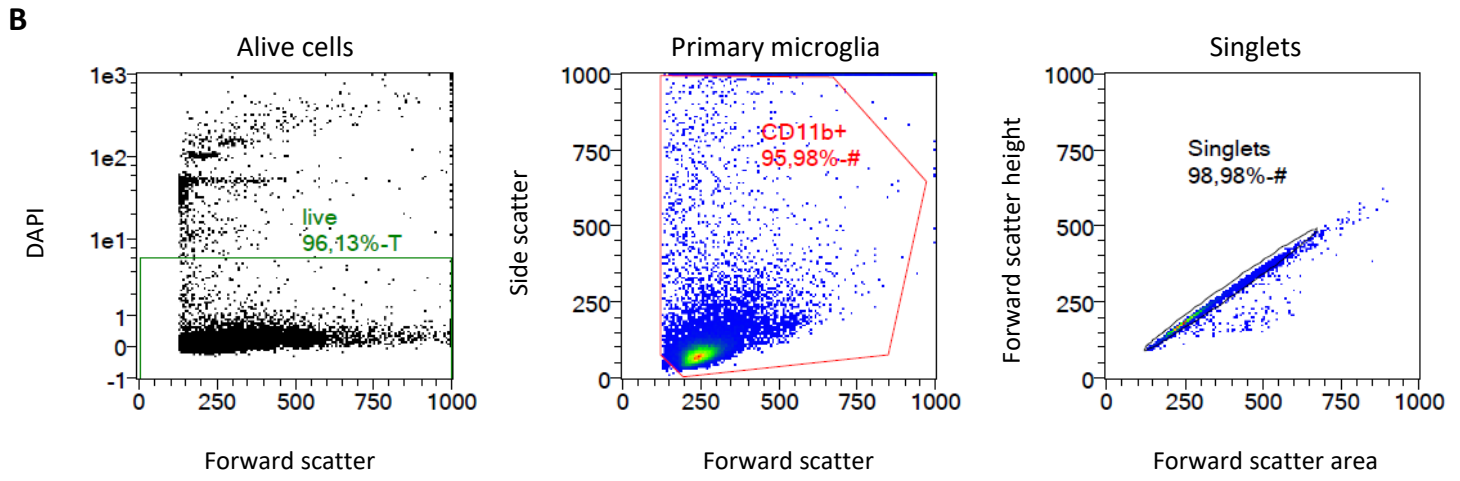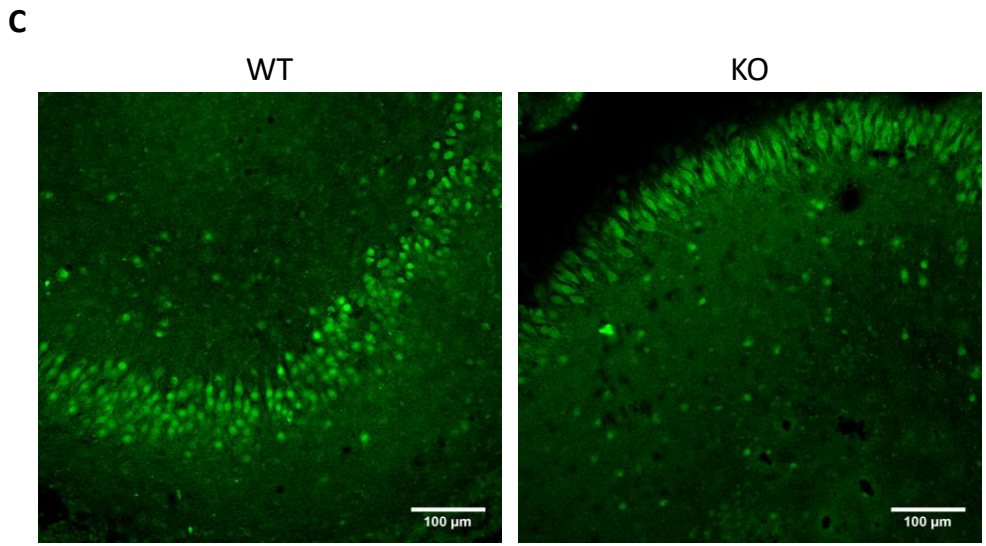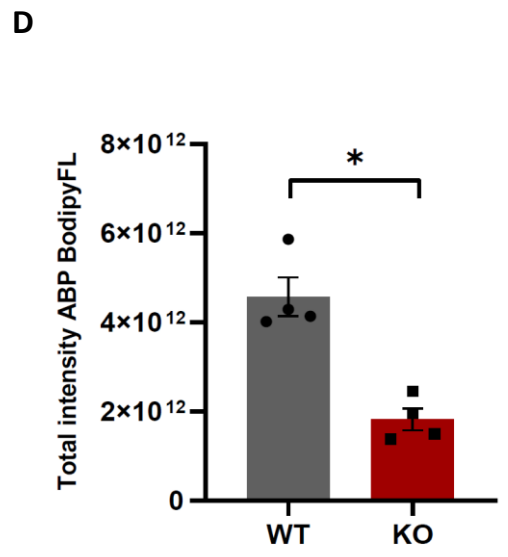



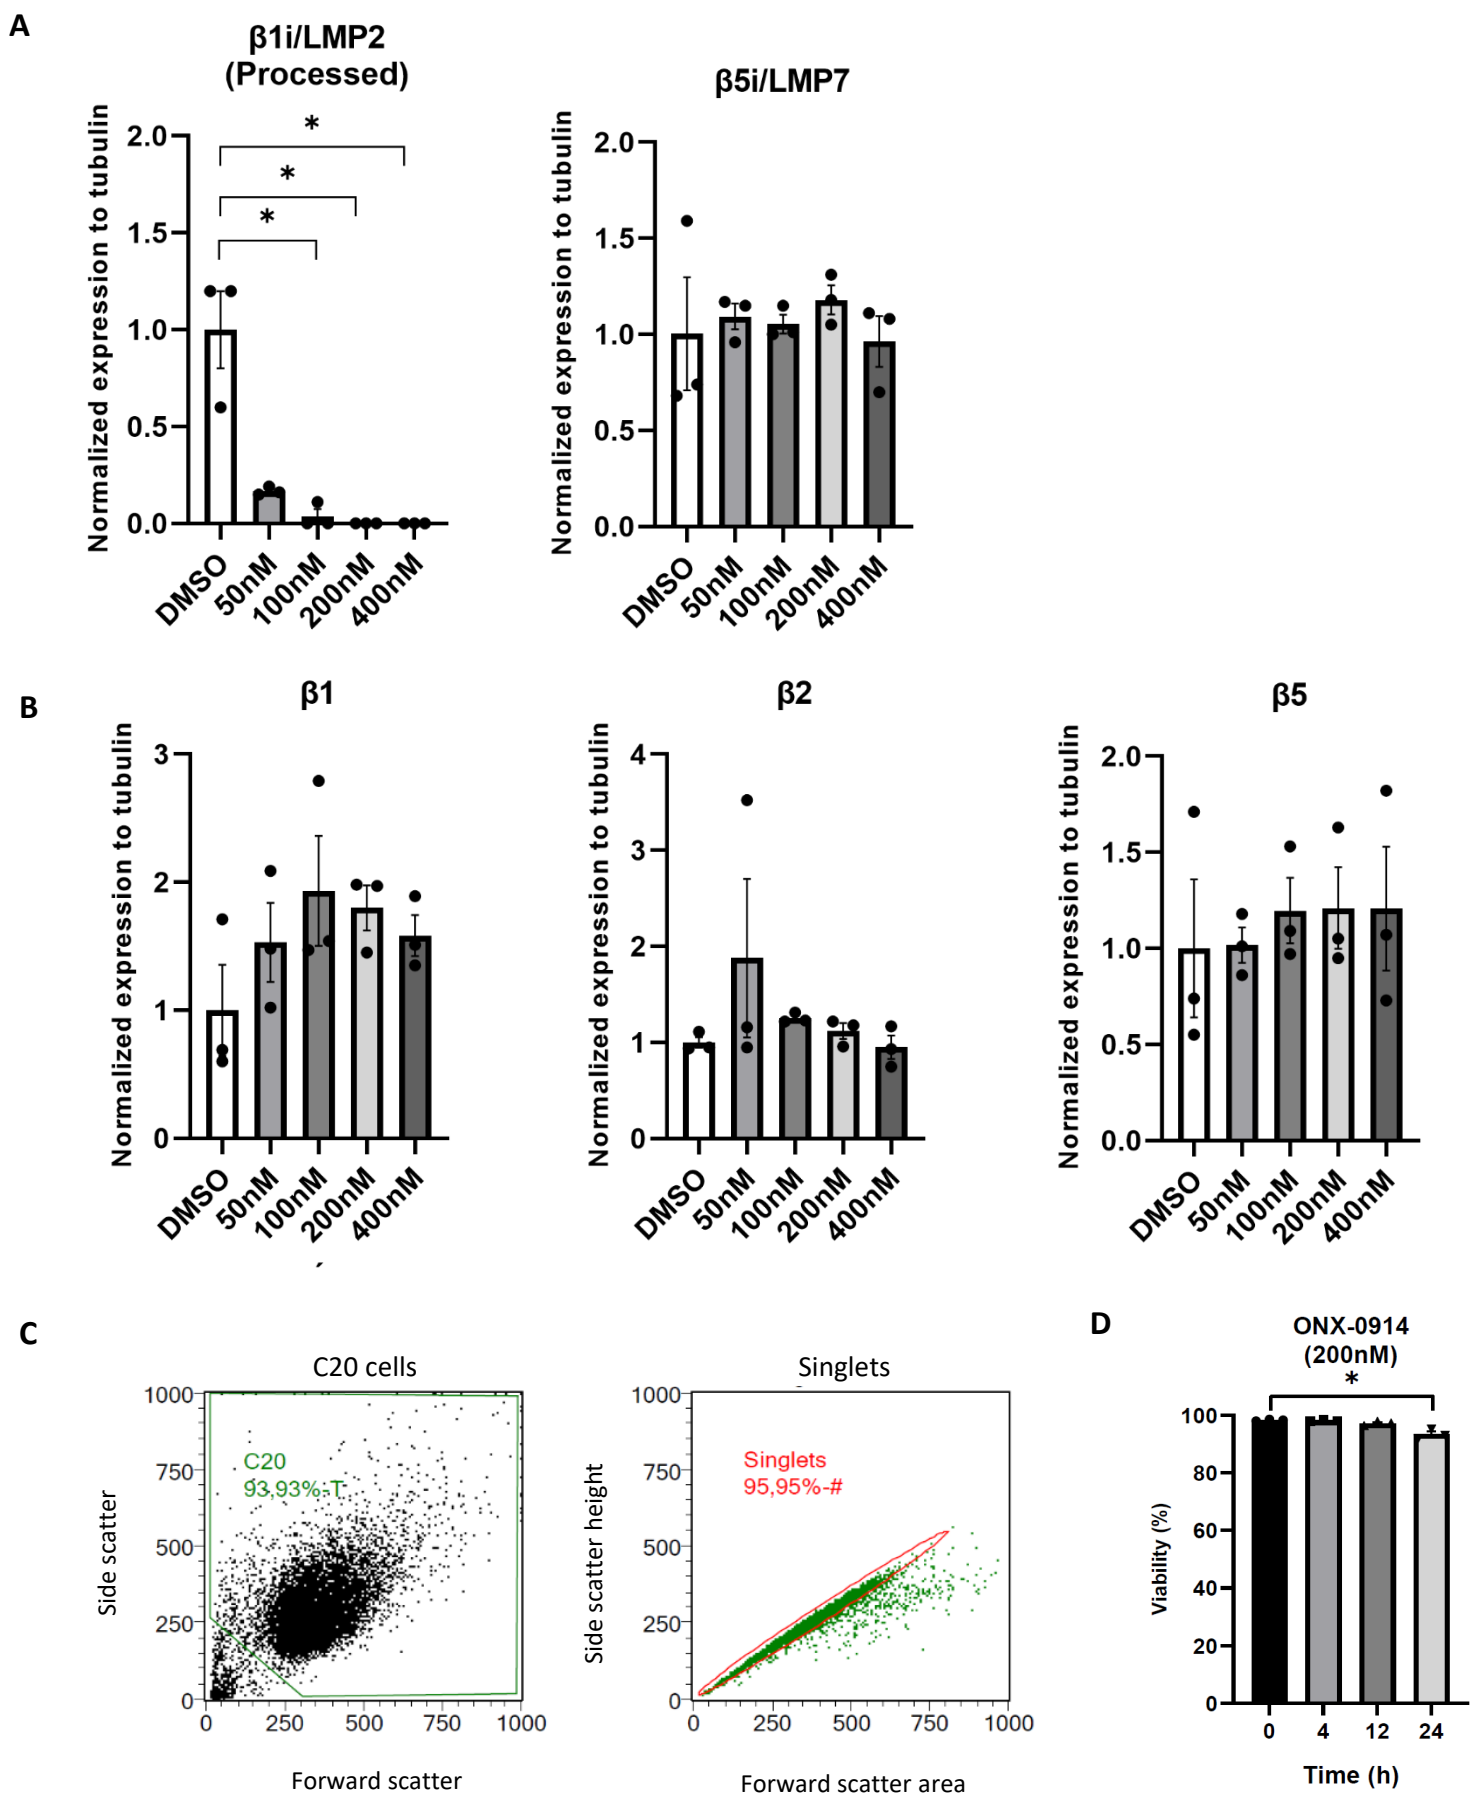

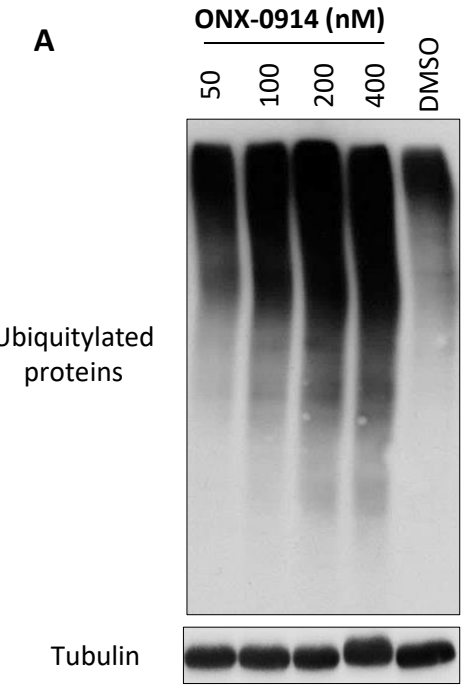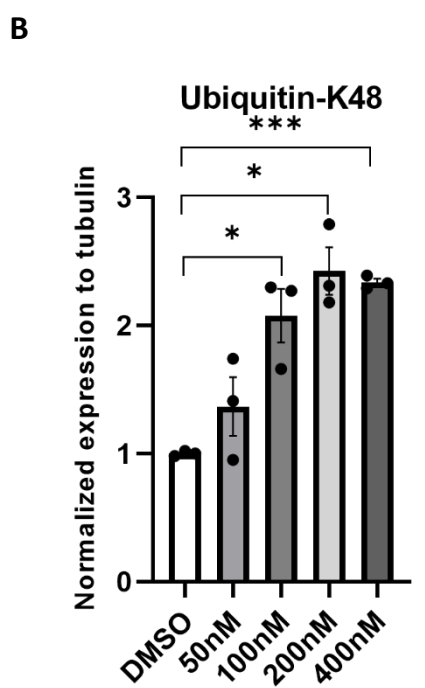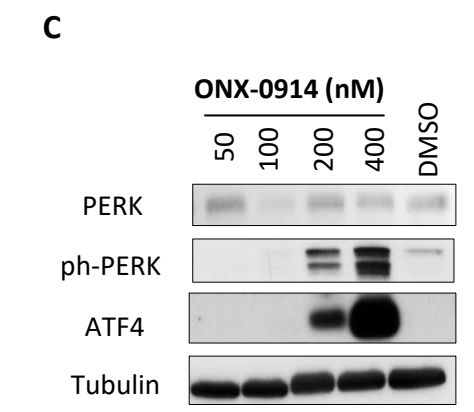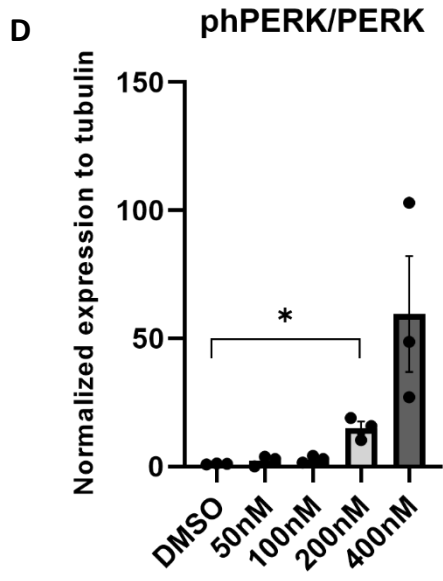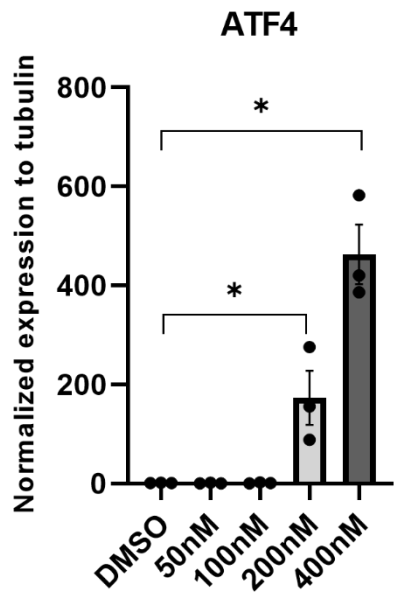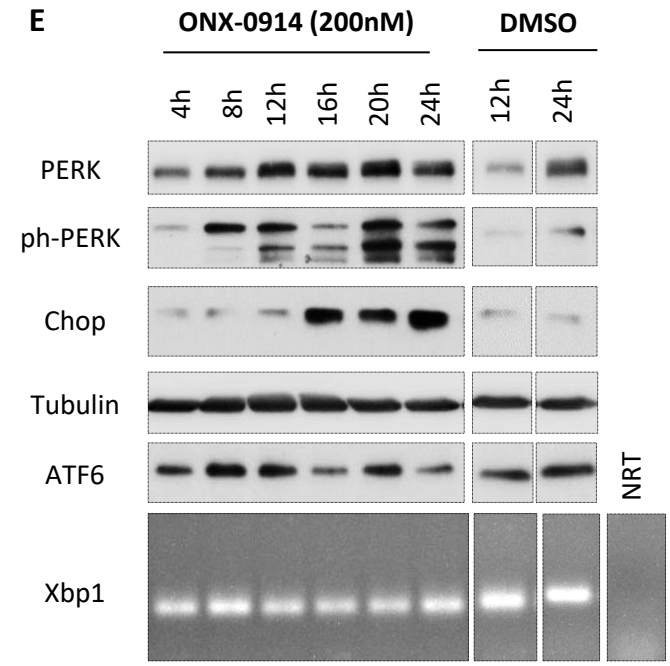

Supplementary Figure 4

C20 cells

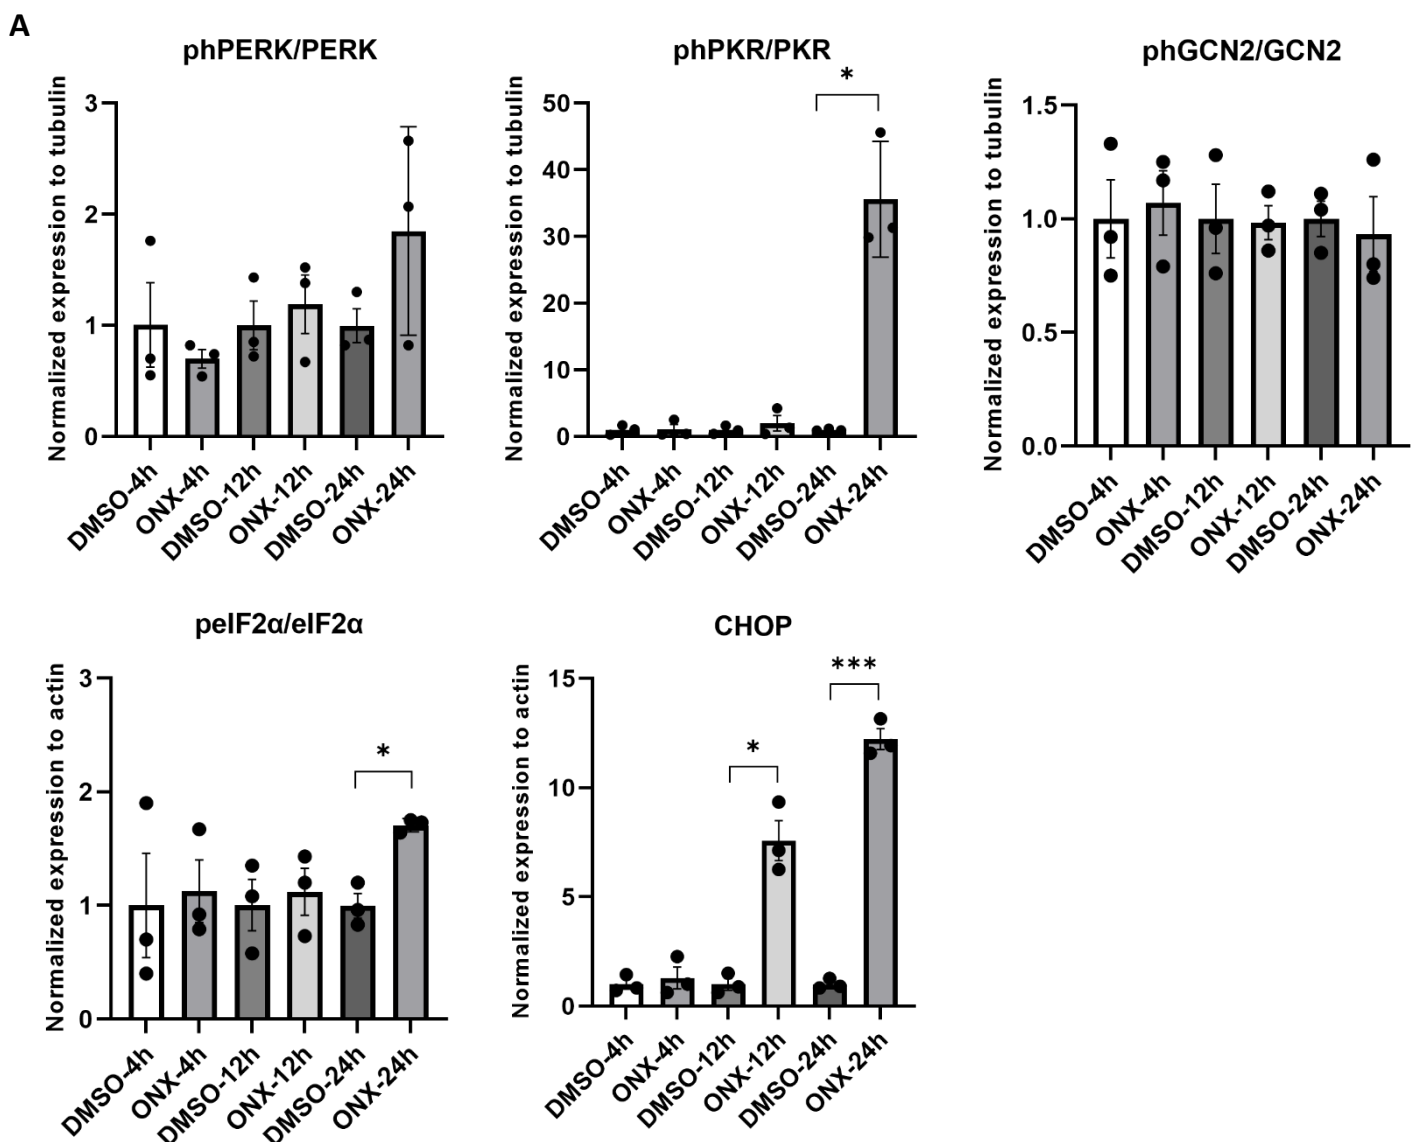

Primary microglia

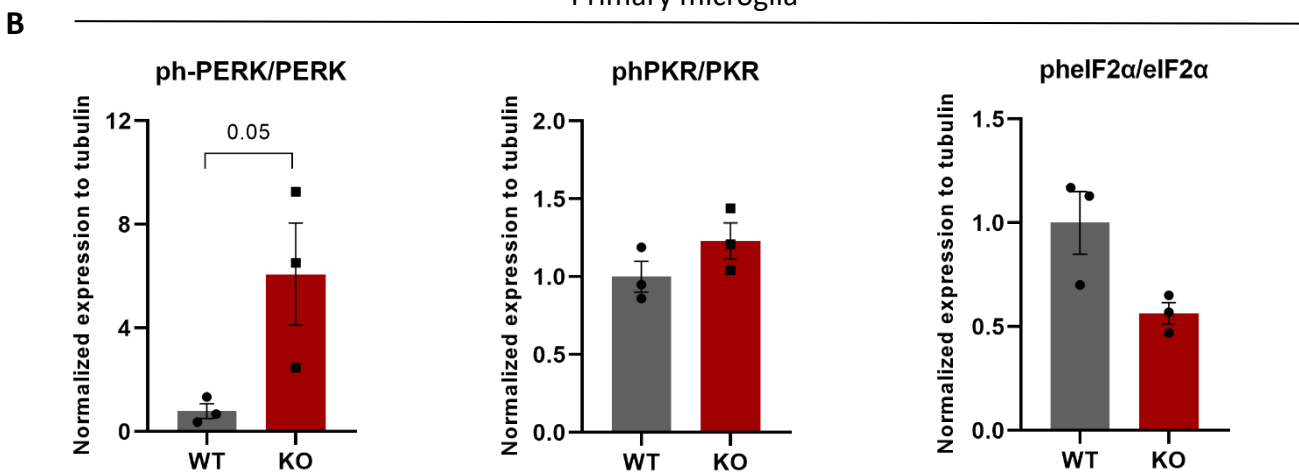

Primary microglia

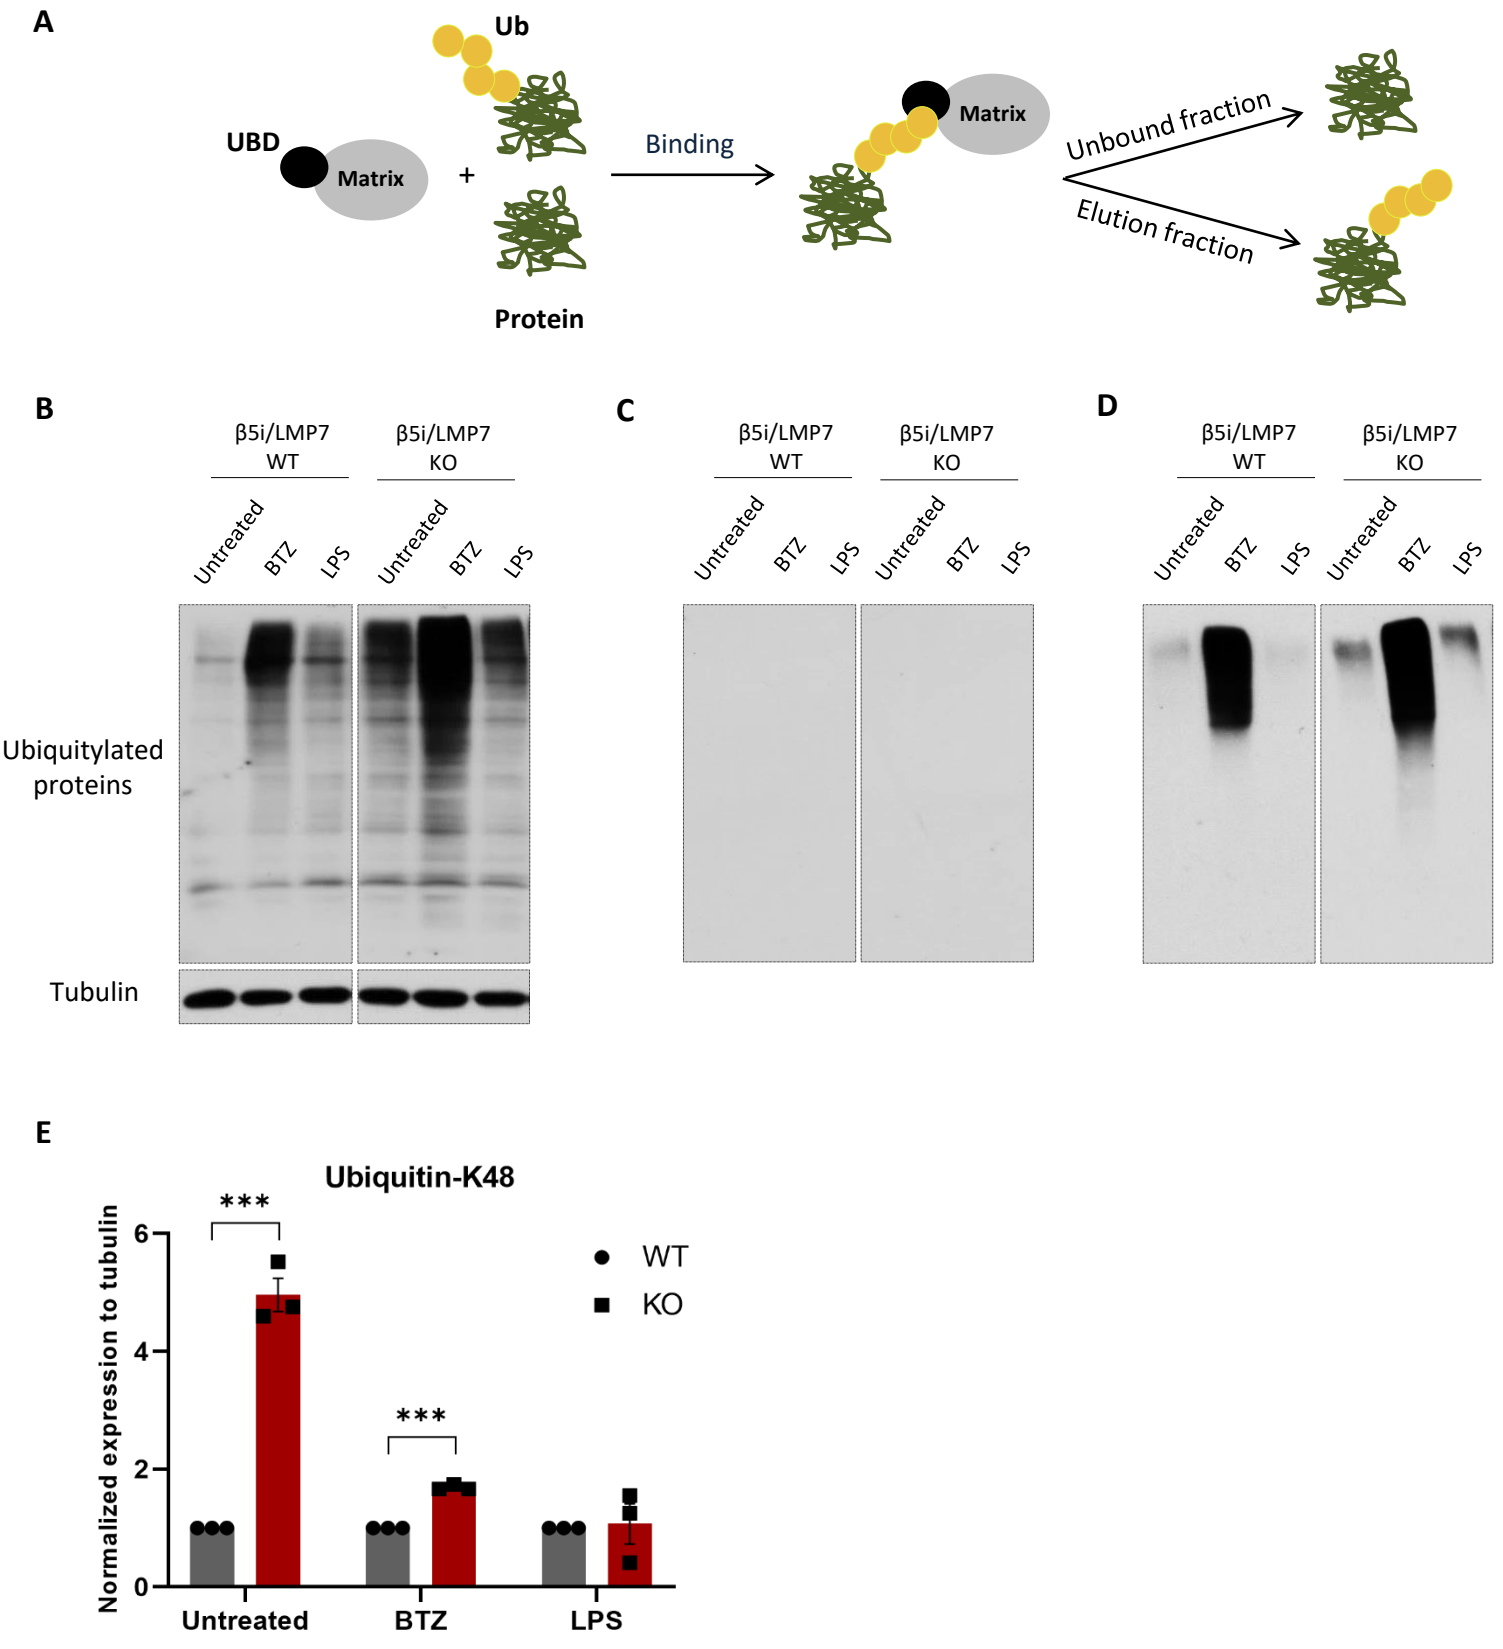

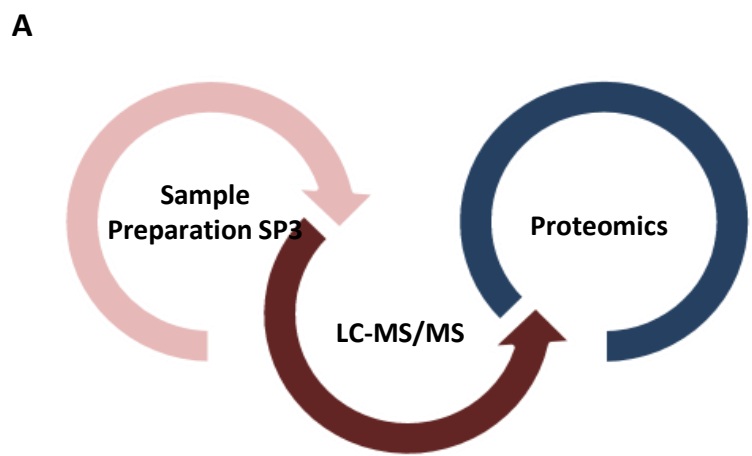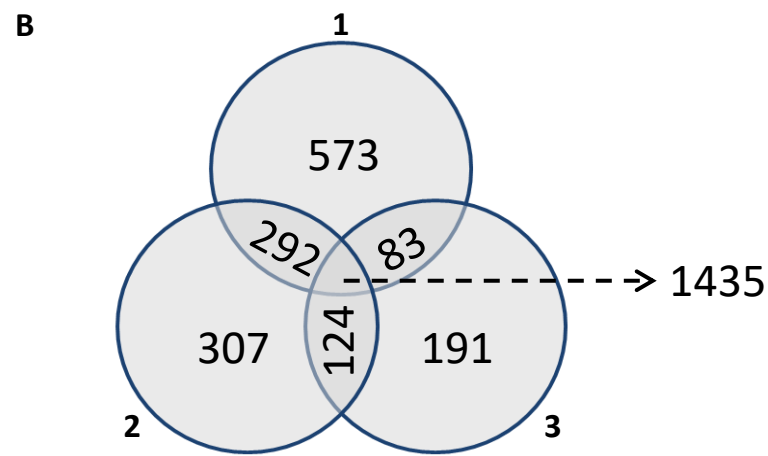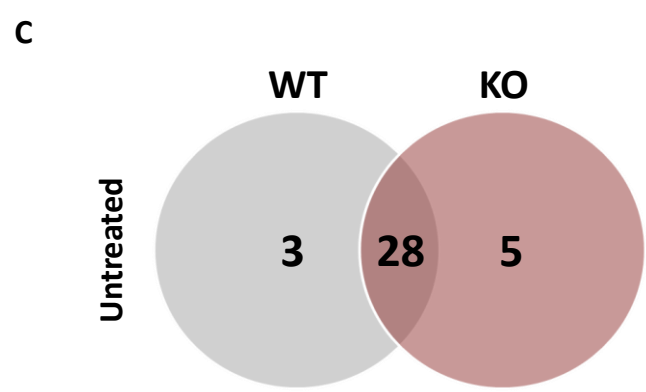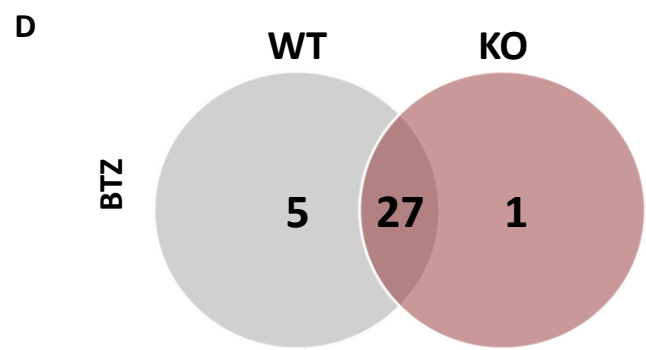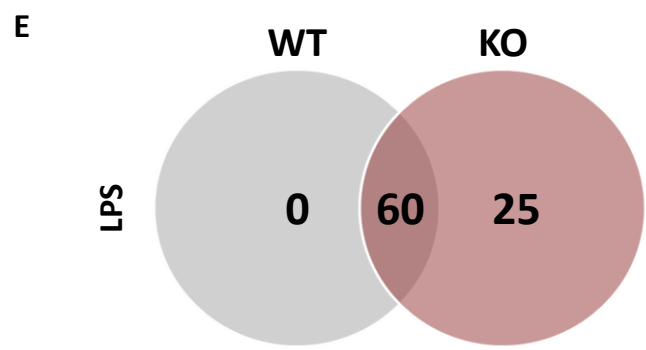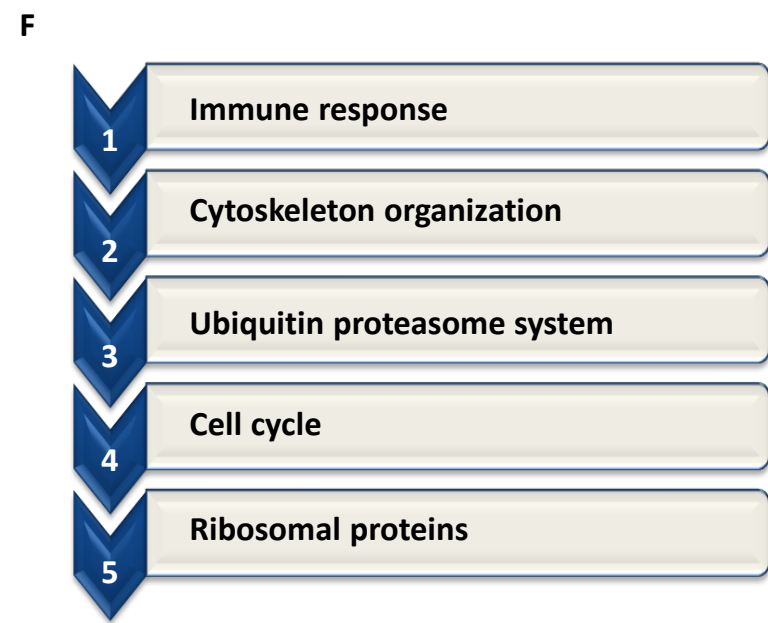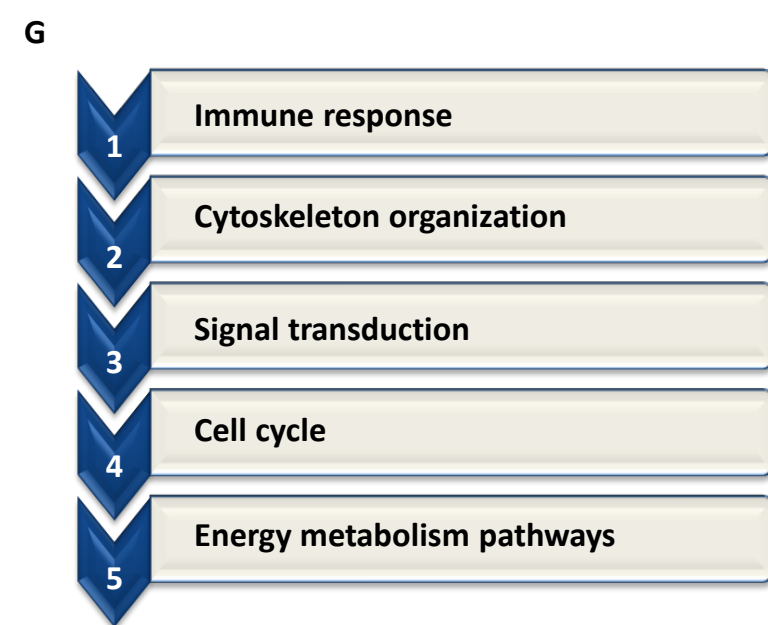

Primary microglia

A

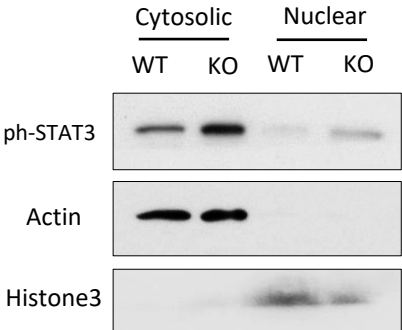

ph-STAT3 (nuclear)

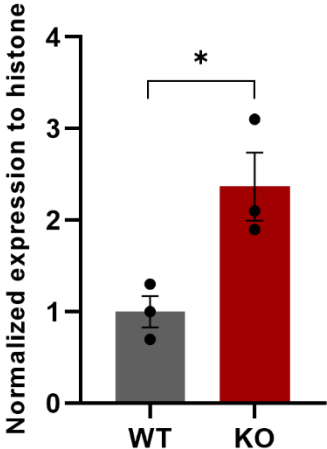

B

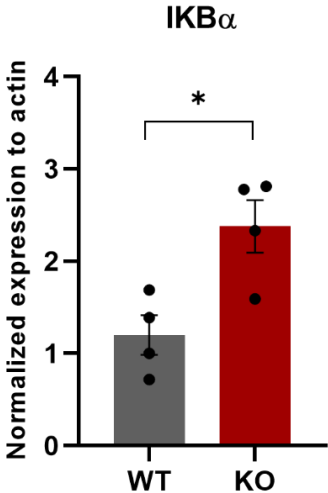

IKBα

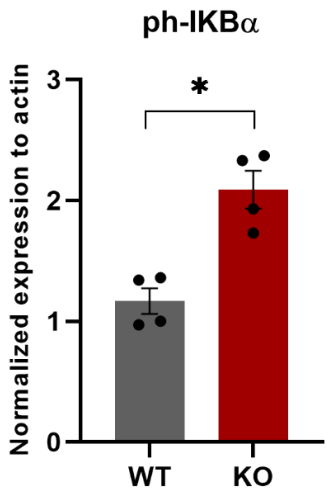

ph-IKBα

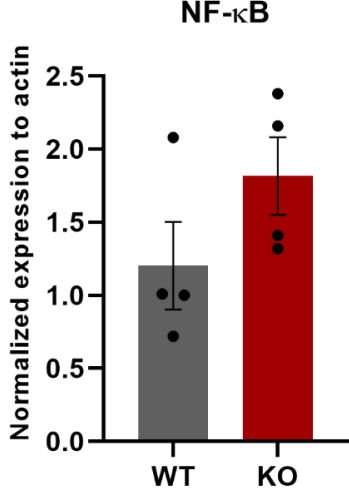

NF-κB

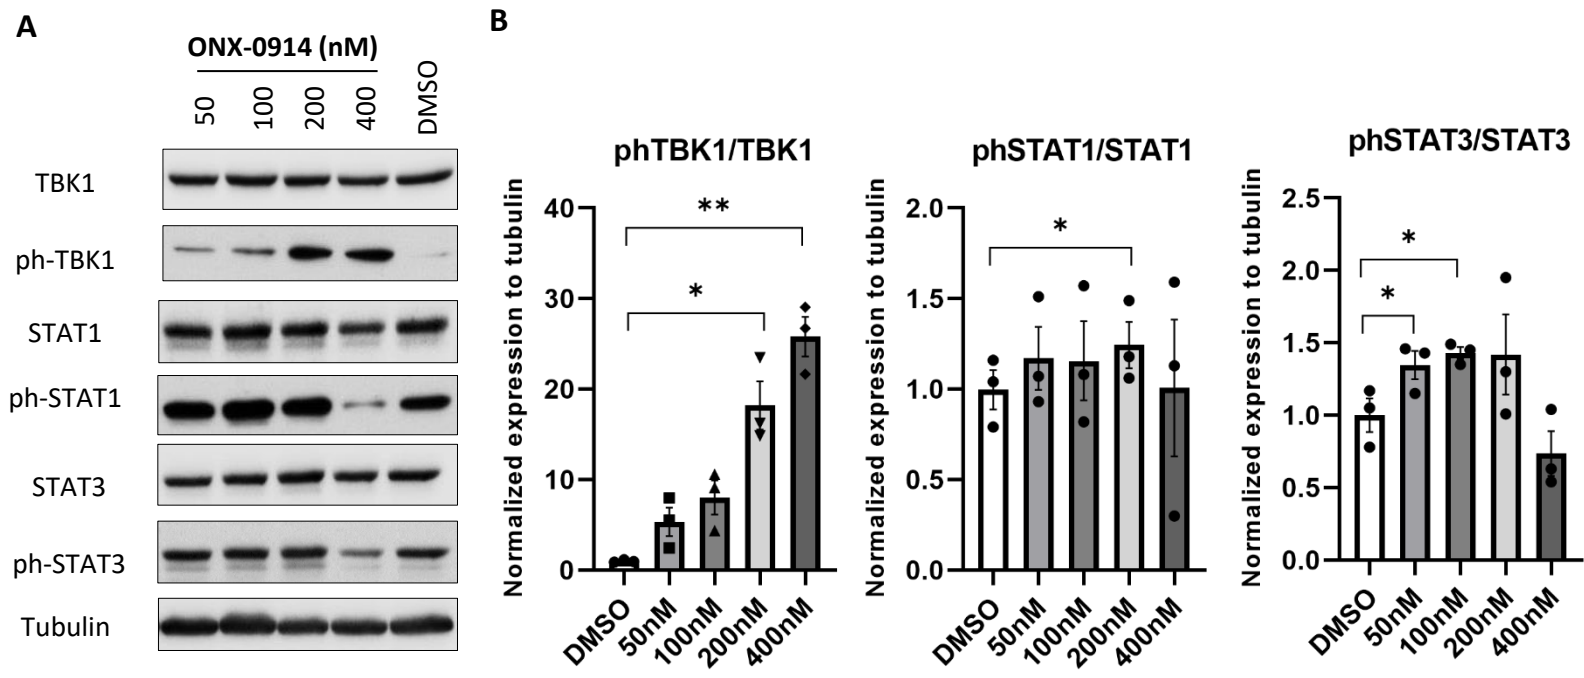

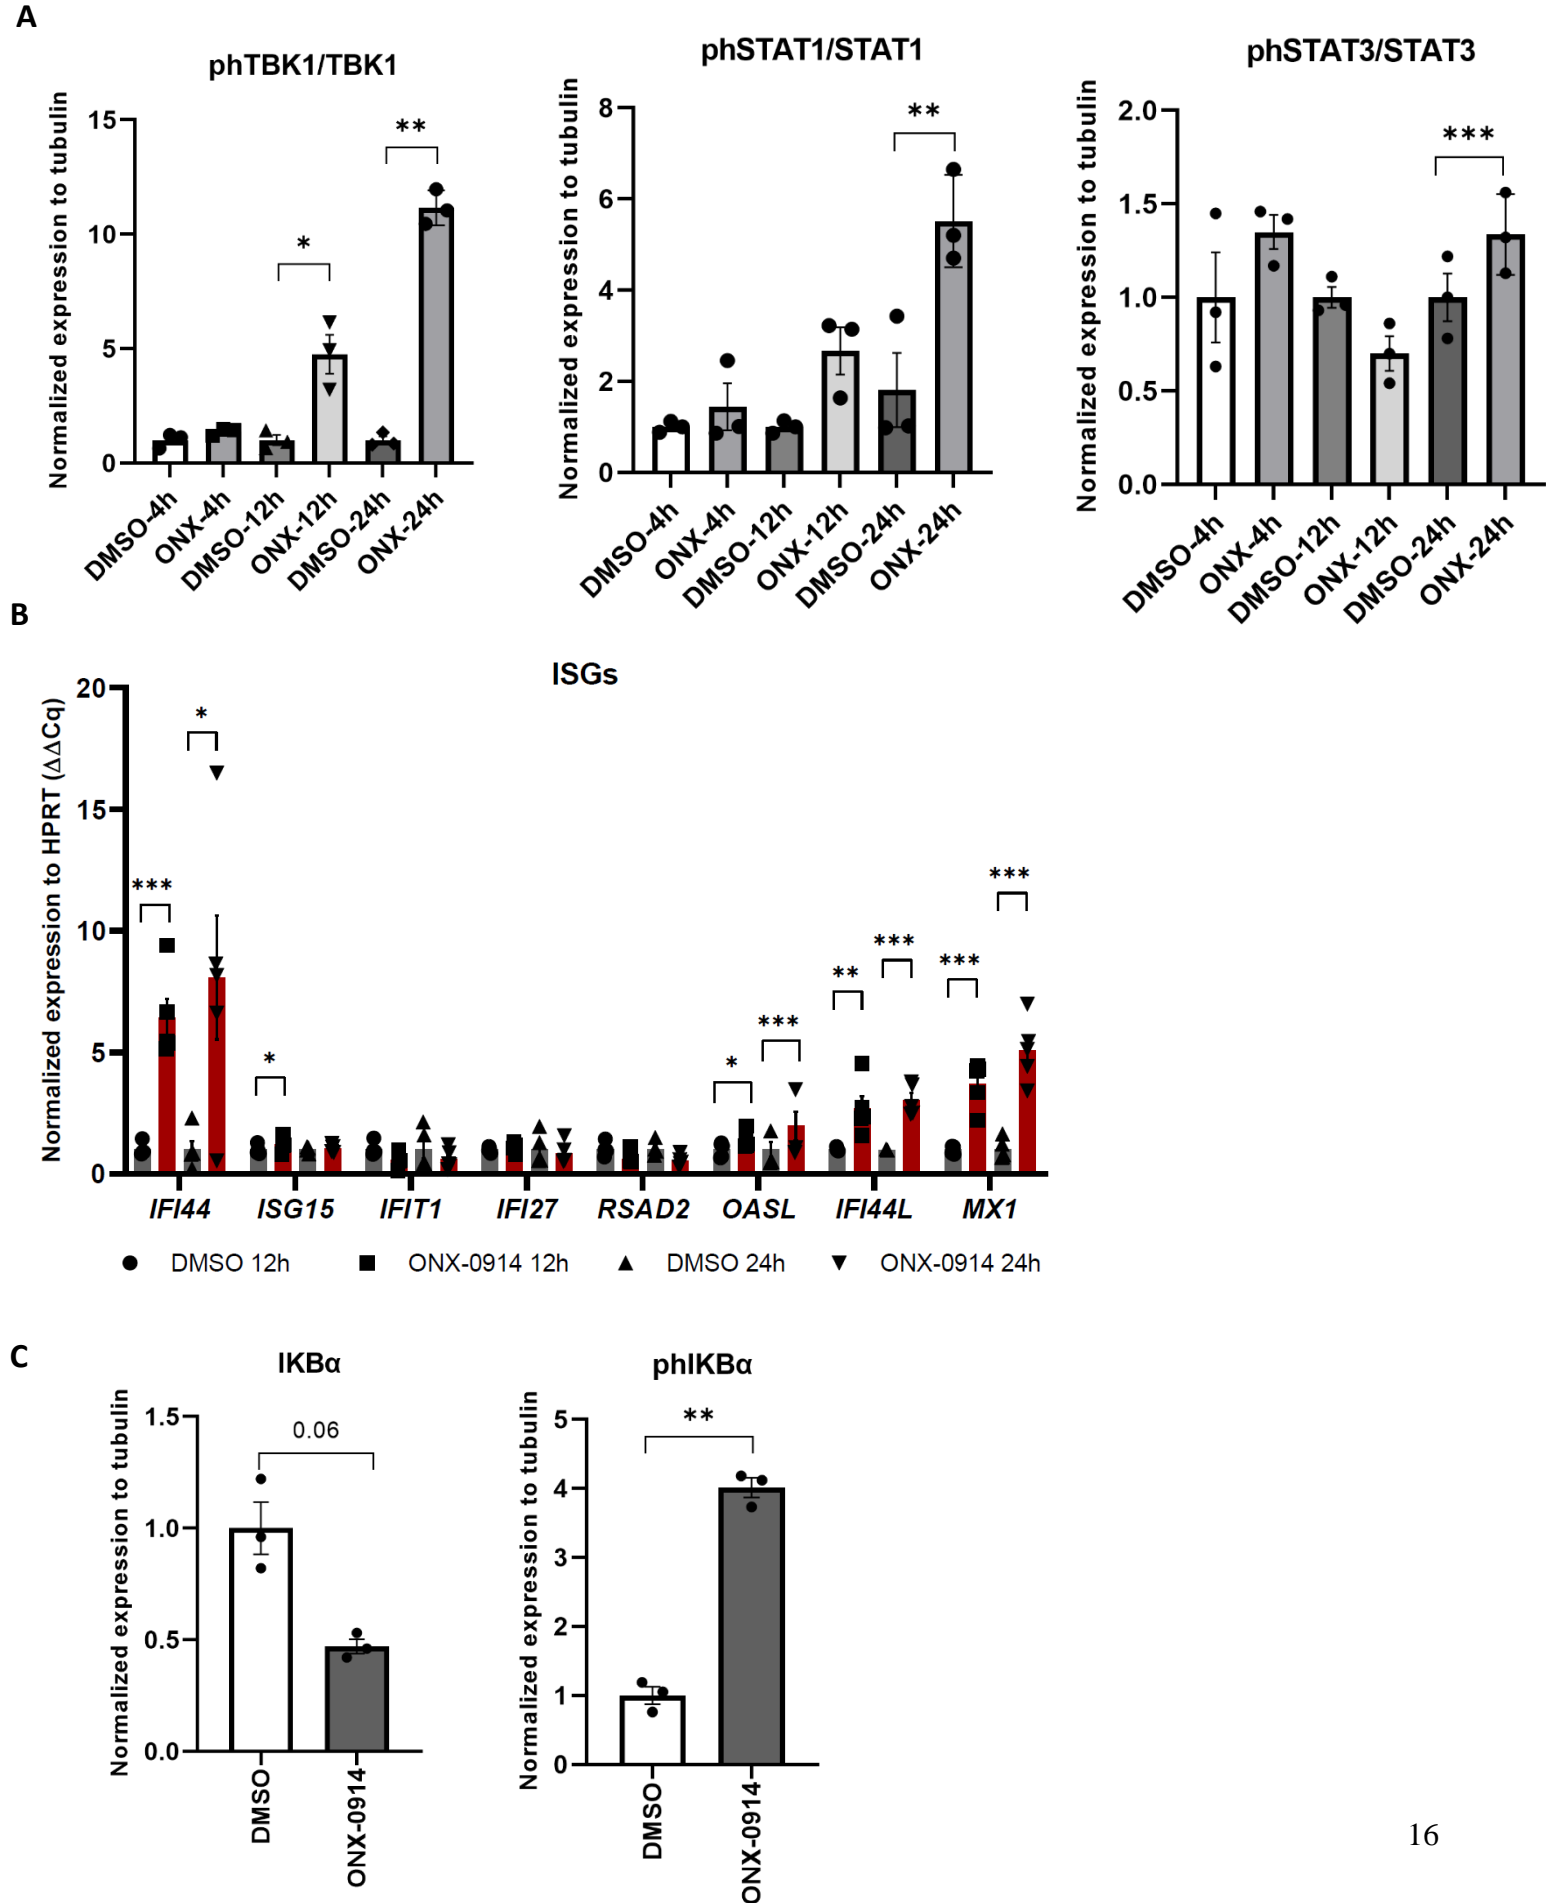



A

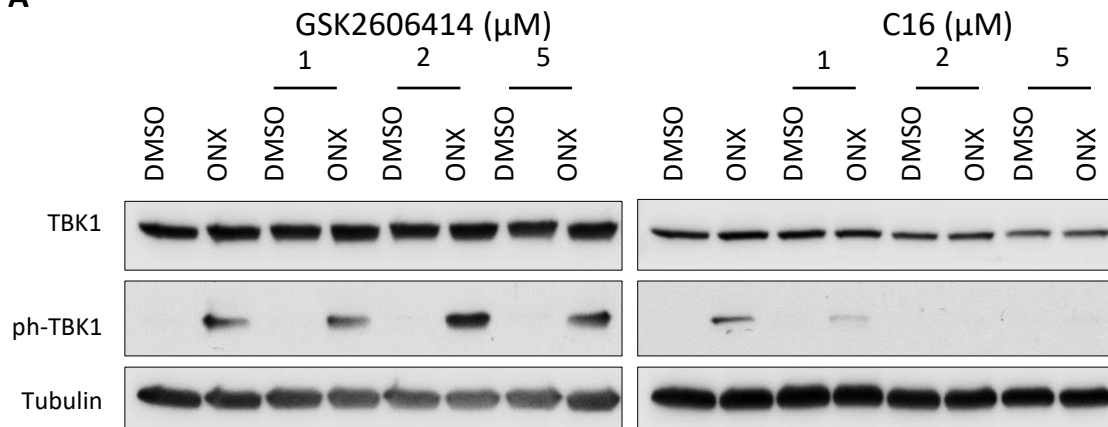

B

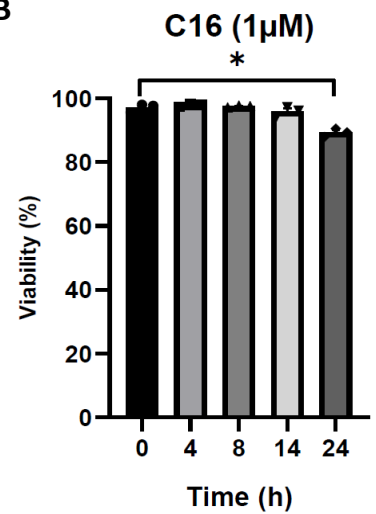

C

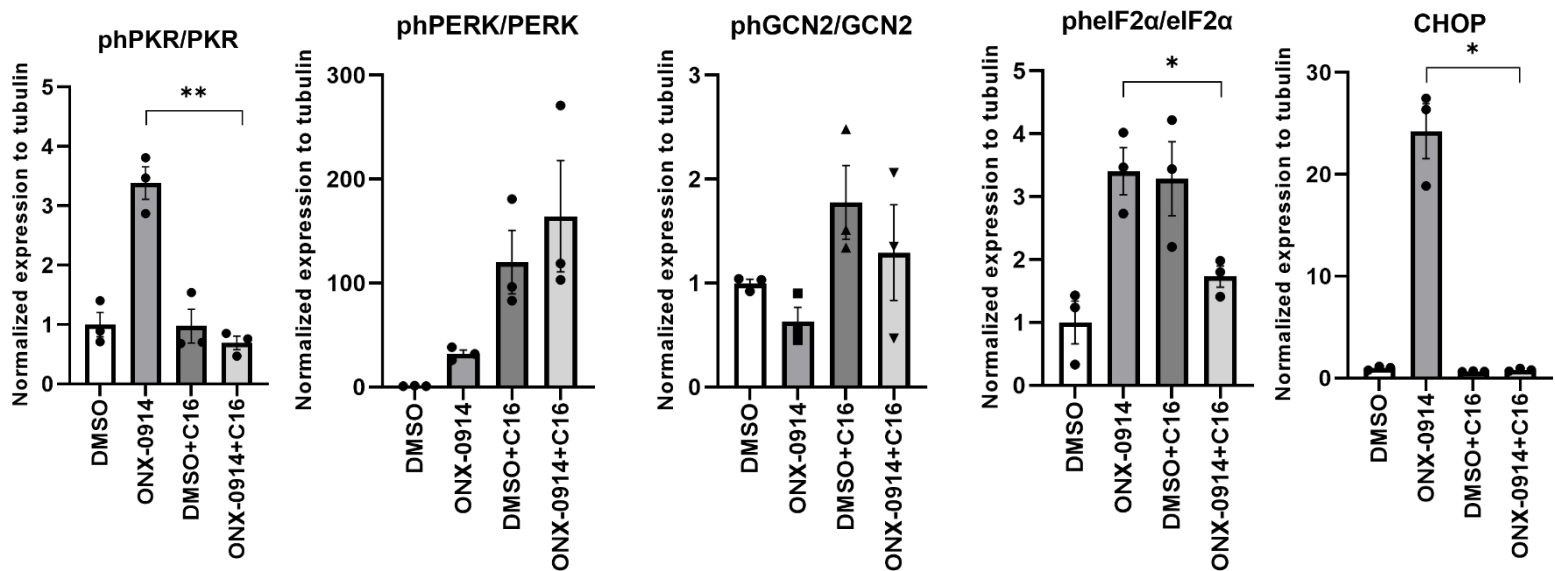

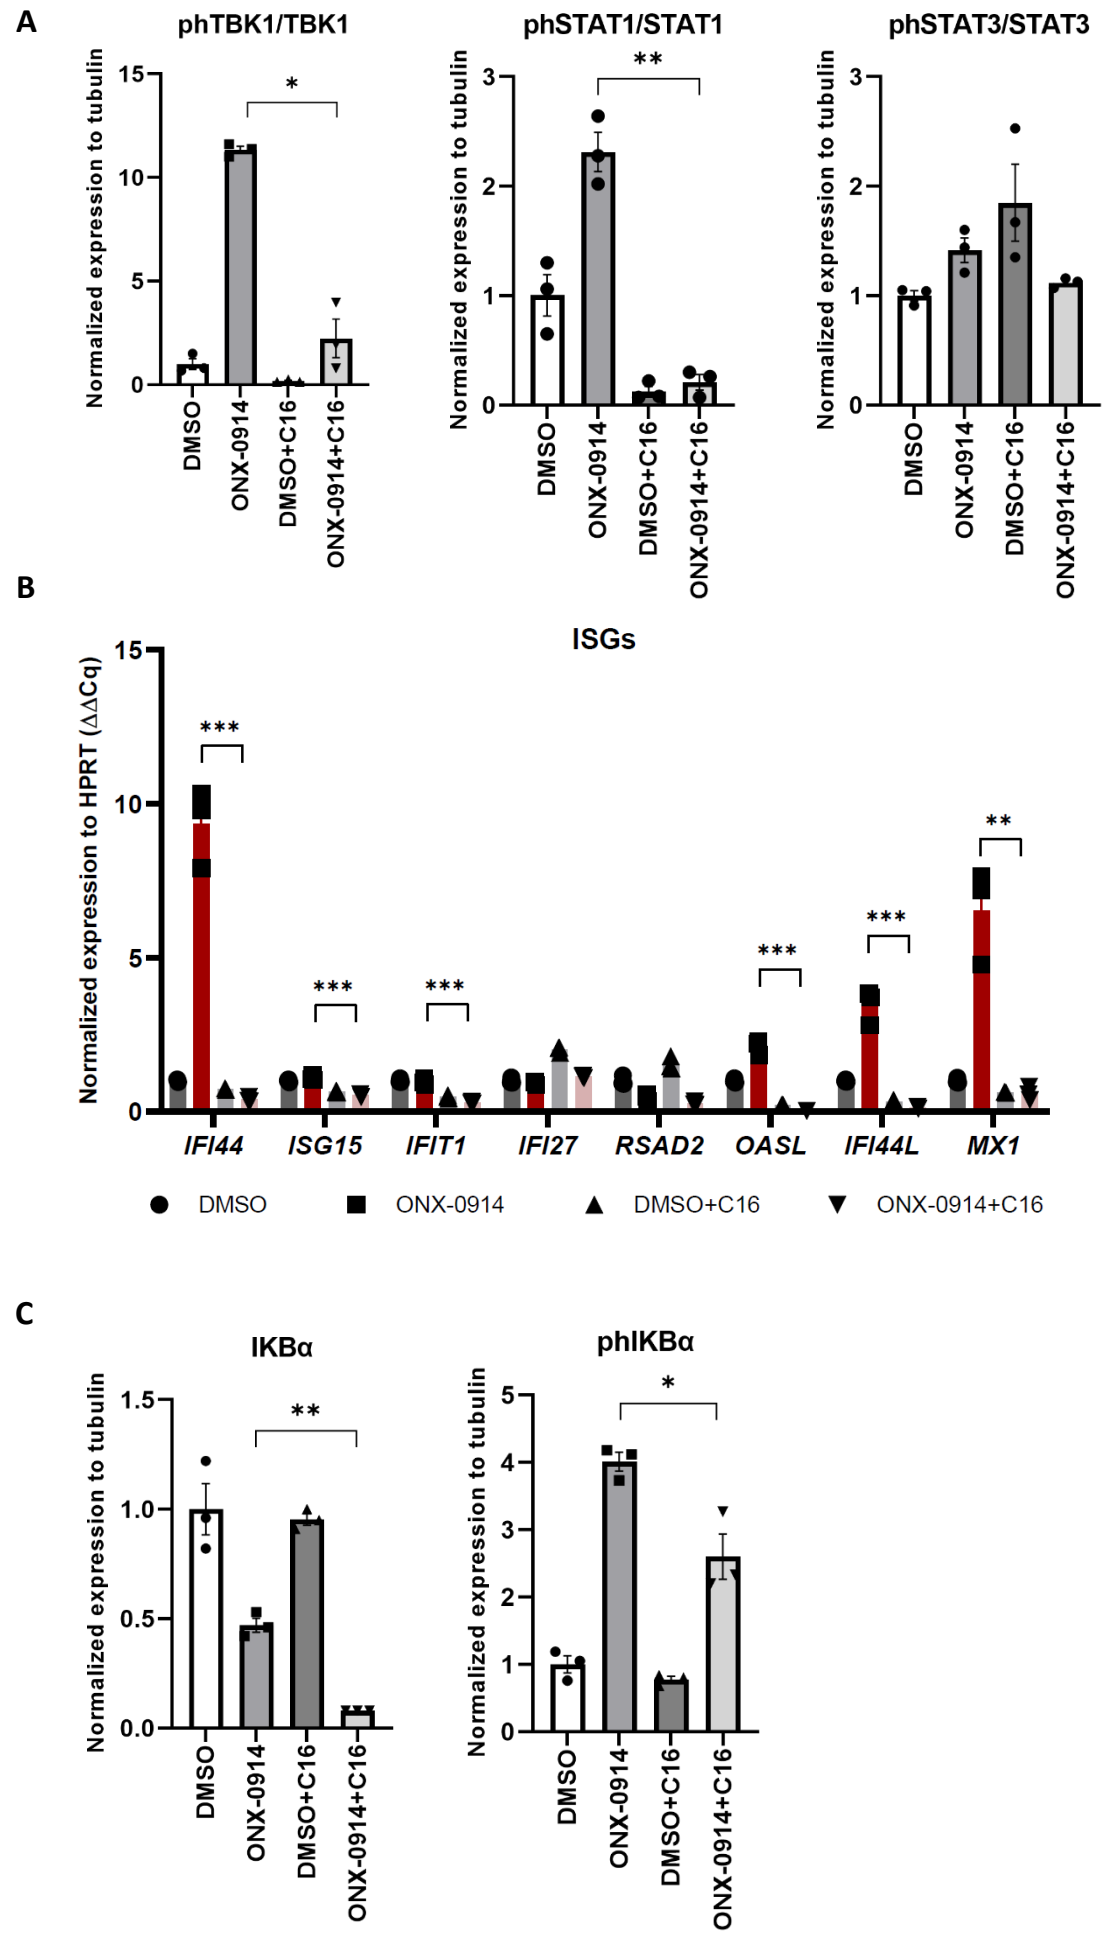

Primary microglia

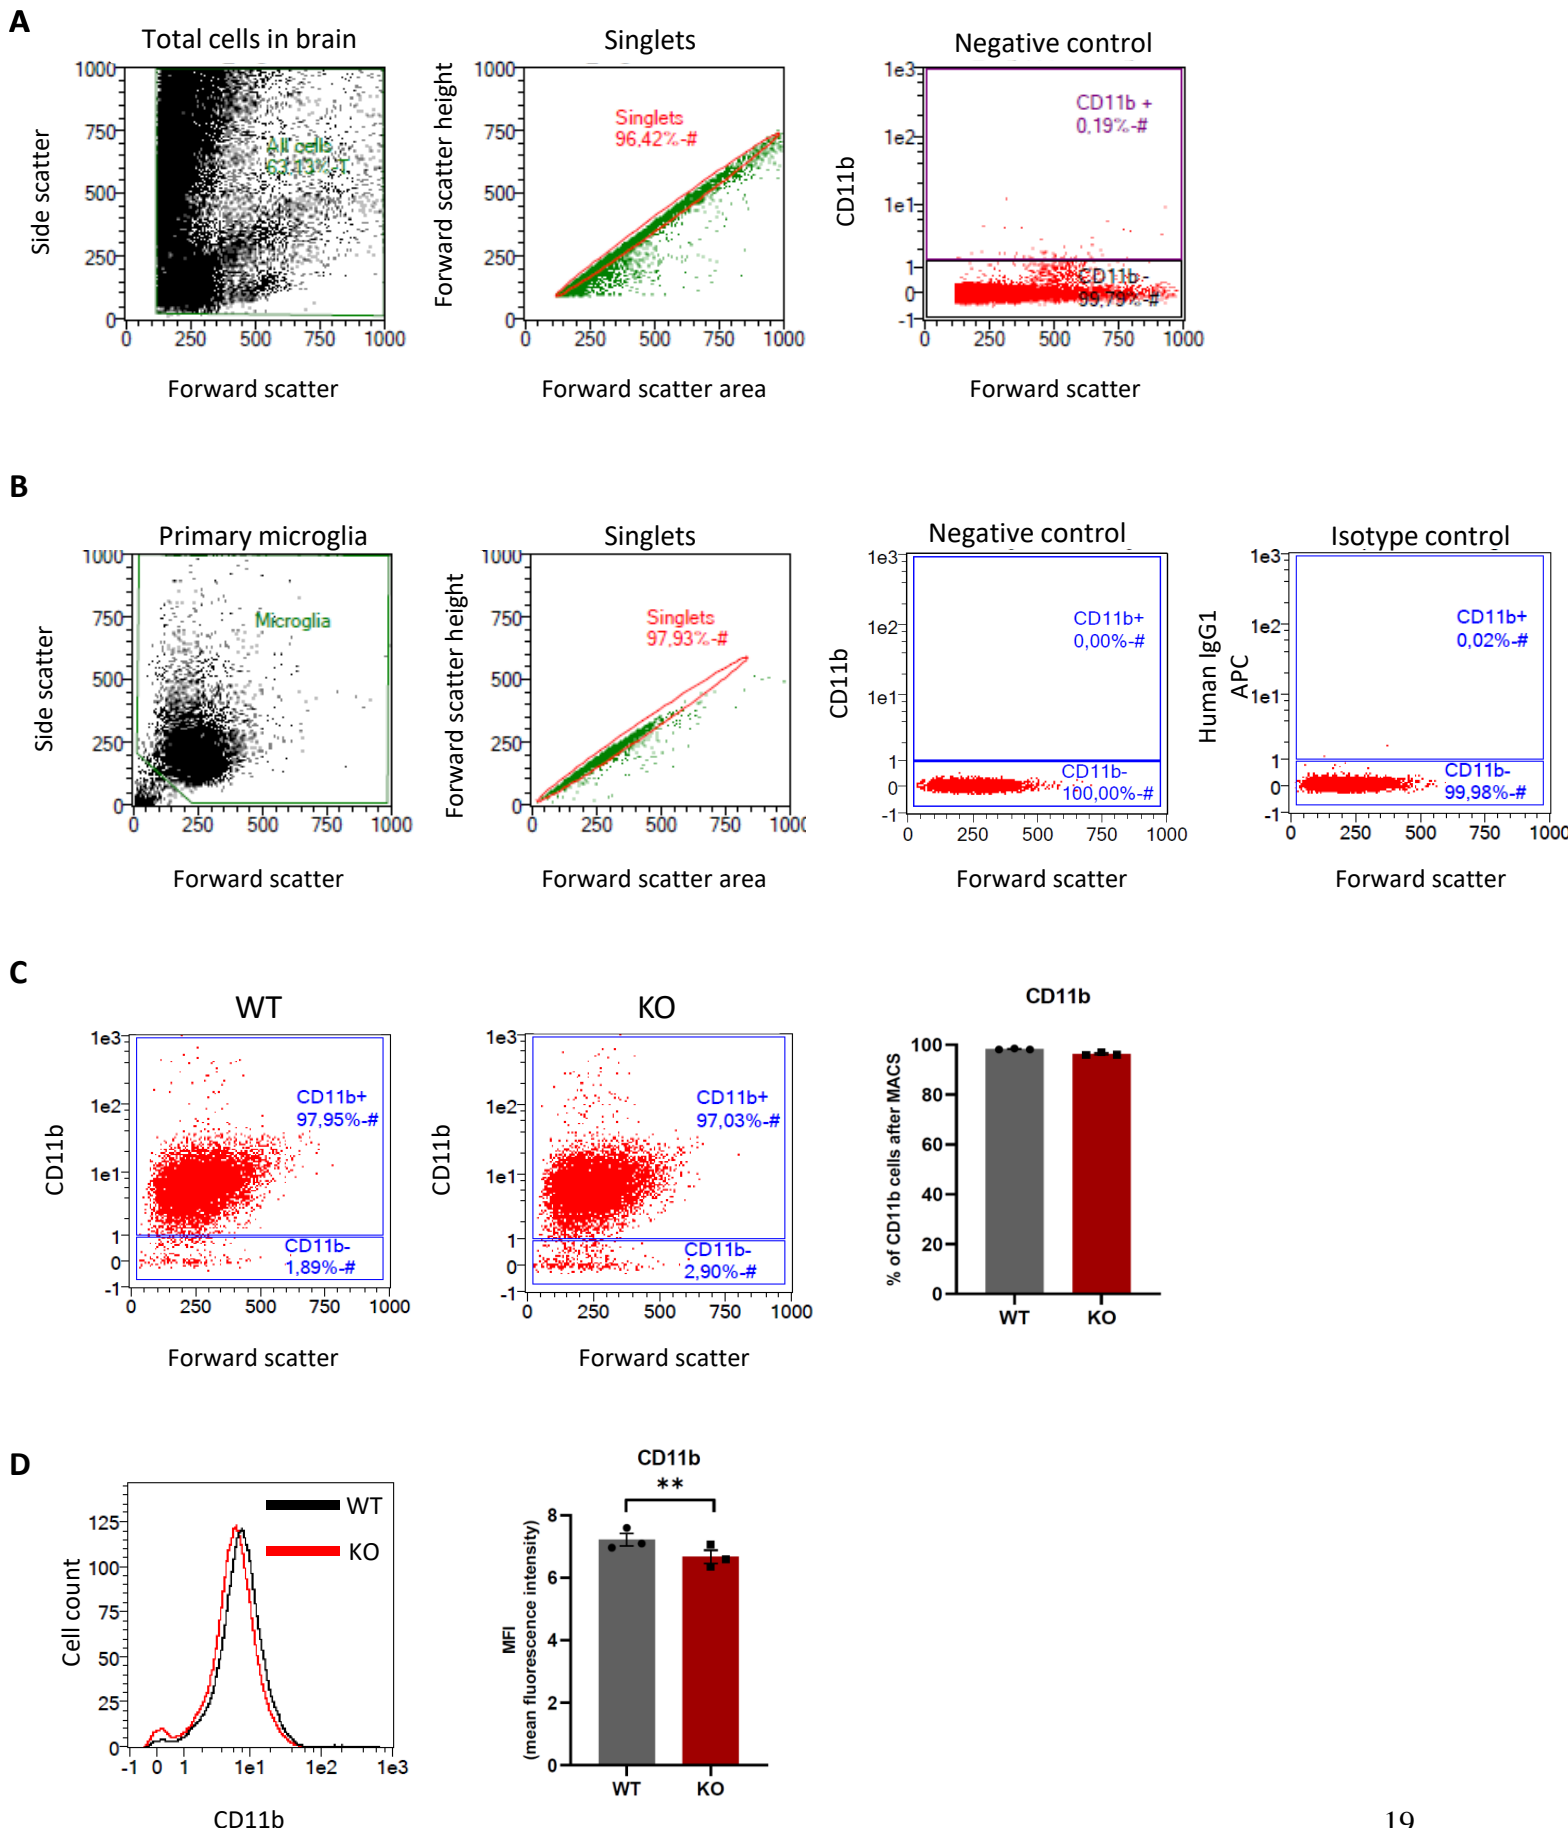

Primary microglia

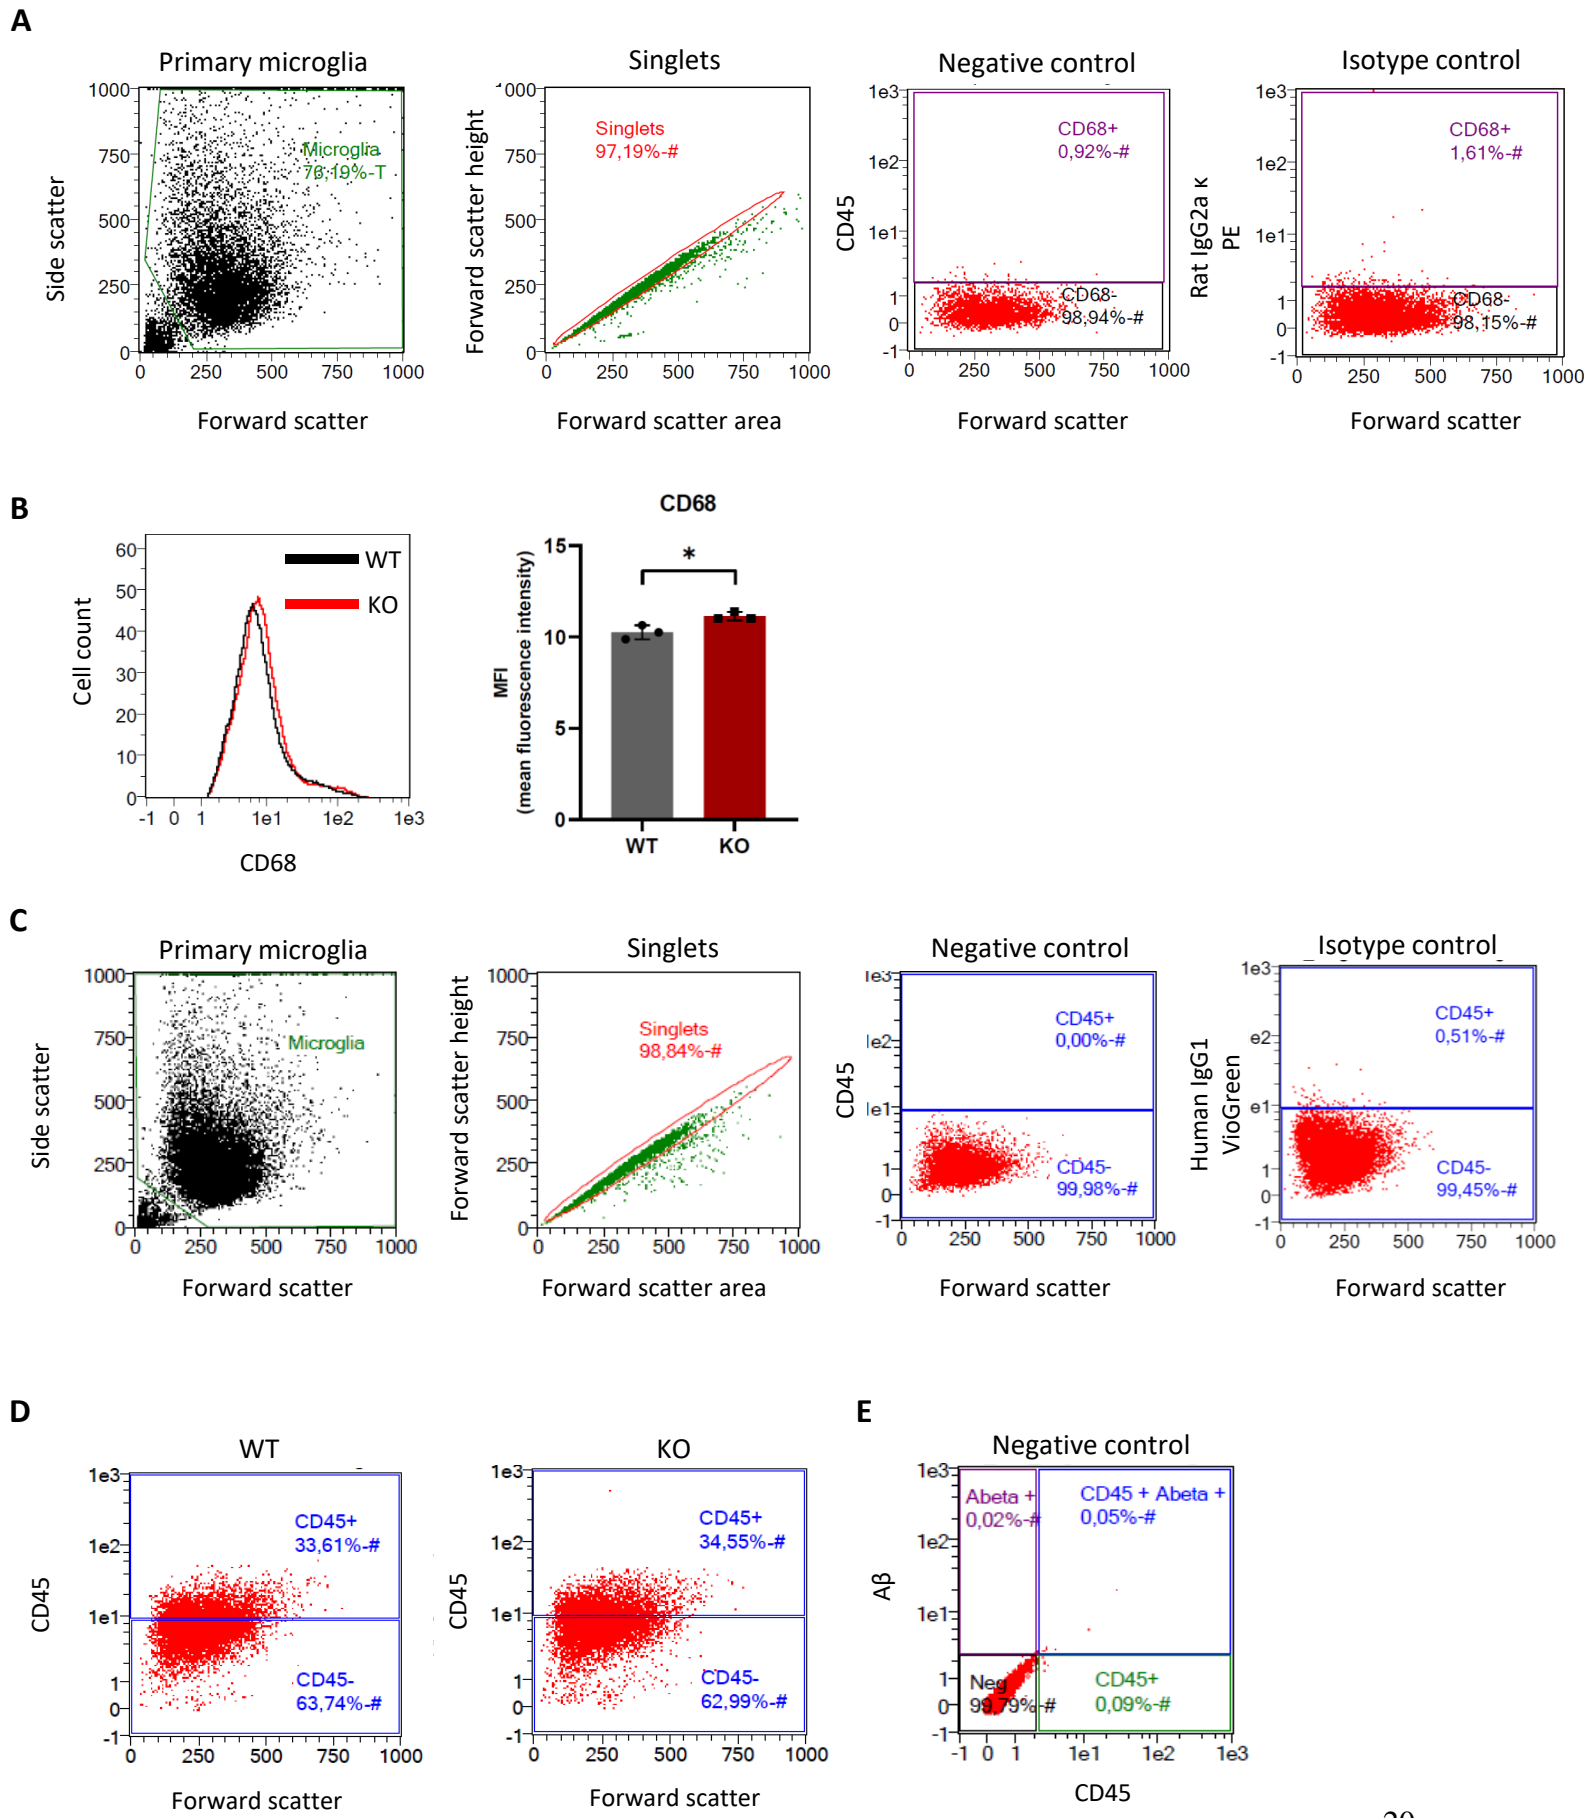

A

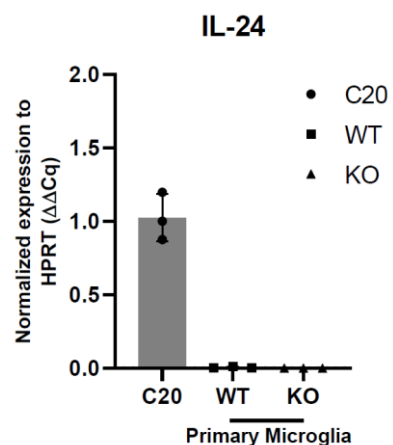

Supplement: DataSheet_1.pdf [file DataSheet_1.pdf]
